# Supplementary material for: An effective encapsulation method for highly stable perovskite solar cells by introducing a UV absorber with biomimetic textures and heat sinker with a reduced graphene oxide composite layer
Source: Royal Society of Chemistry journal article supplement (doi:10.1039/d3tc03354f), 2023-01-01
Supplement: d3tc03354f1.pdf [file d3tc03354f1.pdf]

## Supporting Information

### **Effective encapsulation method for highly stable perovskite solar cells by introducing UV absorber with biomimetic textures and heat sinker with reduced graphene oxide composite layer**

Fuqiang Li <sup>a</sup>, Chaoqun Ma <sup>b</sup>, Xiaofeng Huang <sup>c</sup>, Yoomi Ahn <sup>a</sup>, Danbi Kim <sup>a</sup>, Eunhye Yang <sup>a</sup>, Junpeng Xue <sup>a</sup>, Bo Ram Lee <sup>a</sup>, Junghwan Kim <sup>d</sup>, Yongchao Ma <sup>e</sup> and Sung Heum Park <sup>\*a</sup>

\* Corresponding authors.

*E-mail addresses:* [spark@pknu.ac.kr](mailto:spark@pknu.ac.kr) (S.H.Park)

## 1. Materials and methods

*Materials:* All chemicals were purchased from Sigma-Aldrich (Australia), Alfa Aesar (Australia), and Great Cell Solar (Australia) and used without further purification. Fluorine-doped tin oxide on glass (FTO glass,  $7 \Omega \text{ sq}^{-1}$ ) was purchased from Great Cell Solar. Norland Optical Adhesive (NOA, NOA-63) was purchased from KÖMMERLIN (Germany). The rGO nanosheet was synthesized by a modified Hummers' method, as previously reported.<sup>1</sup> To develop the rGO/NOA-63 composite layer, rGO was added into NOA-63 solution (NOA-63:rGO weight ratio 99:1) and dispersed by sonication for 30 min. The reaction mixture was stirred at 25 °C for 2 h.

*Materials Synthesis:* Formamidinium lead triiodide (FAPbI<sub>3</sub>) powder was synthesized by retrograde method.<sup>2</sup> In detail, PbI<sub>2</sub> and FAI (1:1 molar ratio) were dissolved in 2ME (0.8 M) first and then filtered using a polyvinylidene fluoride filter with 0.45  $\mu\text{m}$  pore size. The filtered solution was placed in a flask incubated in an oil bath at 120 °C for 1 h under continuous stirring. The resulting black powder was filtered using a glass filter and dried at 60 °C for 72 h.

*Solar cell fabrication:* FTO glass was cleaned with Hellmanex solution (Sigma-Aldrich, Australia), acetone, isopropanol and UV-ozone.

A ~20 nm thick dense blocking layer of TiO<sub>2</sub> was deposited by spray pyrolysis of a solution of titanium diisopropoxide bis(acetylacetonate) in isopropanol (mass fraction = 8.4%) at 450 °C.

For the fabrication of the mesoporous TiO<sub>2</sub> layer (m-TiO<sub>2</sub>), a suspension containing 150

mg/mL Dyesol 30 NR-D TiO<sub>2</sub> paste (GreatCell Solar, Australia) dispersed in ethanol was spin-coated at 4000 rpm (acceleration of 2000 rpm/s) for 15 s on top of the c-TiO<sub>2</sub> layer. The substrates were then annealed at 100 °C for 10 min followed by sintering at 500 °C for 30 min.

The perovskite precursor solution was prepared by dissolving 1550 mg FAPbI<sub>3</sub> and 61 mg MACl with 1 mL DMF/DMSO (4:1). The perovskite solution was filtered with a PVDF filter (0.2 μm) and then 70 μL of the filtered perovskite solution was spread onto different ETLs at 8000 rpm for 50 s. During the spin-coating, 1 mL diethyl ether was dropped on the perovskite film at 10 seconds. The resulting film was annealed at 150 °C for 15 mins and 100 °C for 30 mins on a hotplate. After the substrates cooling down, octylammonium iodide/IPA solution (15 mM) was spin-coated on the perovskite layer at 3000 rpm for 30 s.

For the hole transport layer, the Spiro-OMeTAD solution was spin-coated on the perovskite layer at 4000 rpm for 30 s. Spiro-OMeTAD (90 mg/mL in CB) was doped with 39 μL 4-tert-butylpyridine (tBP), 23 μL Li-bis(trifluoromethanesulfonyl)imide (Li-TFSI) (520 mg/mL in acetonitrile) and 5 μL FK209 (180 mg/mL in acetonitrile).

The Au electrode was deposited onto the Spiro-OMeTAD layer using a thermal evaporation system. 100 nm thick Au was deposited at 2 Å/s under a pressure of 10<sup>-6</sup> Torr.

*Replication of the plants' epidermal surface onto a UV absorption layer:* First, the fresh petal was fixed in a polydimethylsiloxane (PDMS) mold. The PDMS was hardened at 60 °C on a hot plate for 4 h and then separated from the petal, which left a flexible petal

PDMS stamp. Plant remnants on the PDMS were removed in an ultrasonic bath with isopropanol.

In order to replicate the structures into UV-absorbing layer, the following steps were carried out: a drop (around 50  $\mu\text{L}$ ) of UV-curing adhesive UV-9/NOA-63 was placed on the glass substrate and the PDMS mold was carefully pressed into the drop, ensuring that any air bubbles were directed to the sample edges. After 1 min of UV exposure (at 1.5  $\text{mW cm}^{-2}$  UV radiation power), the PDMS stamp was separated from the cured NOA-63 to be reused for further replicas (**Figure S2**).

*PeSC packaging:* To ensure good hermetic packaging by blanket encapsulation, clean and residue free edges around the active PeSC area were prepared. The UV-curable glue (rGO/NOA-63) was deposited on the active area and a 1–2 mm thick cover glass was laid on top. The glue was cured by gently pressing over the cover glass and applying about 30 s of UV irradiation.

*Characterization of the UV absorption layer:* Differential scanning calorimetry (DSC) was employed to evaluate the glass transition temperature ( $T_g$ ) of the NOA-63 material, by means of a Mettler-Toledo DSC/823e instrument at a scan rate of 20  $^{\circ}\text{C min}^{-1}$  under  $\text{N}_2$  flux. Values of  $T_g$  were obtained from the second heating ramp. The thermal stability of the UV-coating was evaluated by means of thermo-gravimetric analysis (TGA) on fully crosslinked solid state samples with a Q500 TGA system (TA Instruments) operated from ambient temperature to 800  $^{\circ}\text{C}$  at a scan rate of 10  $^{\circ}\text{C min}^{-1}$  both in air and under flowing  $\text{N}_2$ . The surface morphologies of the patterned NOA films were inspected using a field-

emission scanning electron microscope (FESEM, JEM-2100 F, JEOL LTD). The water contact angle was measured using dynamic contact angle equipment (DCA, Phoenix 300, SEO).

*PeSC characterization:* The solar cells were measured using a solar simulator (Newport-Oriel 94083A) together with a Keithley source meter 2400. Solar cells were covered with a black metal mask limiting the active area to 0.08 cm<sup>2</sup> and reducing the influence of the scattered light. The light intensity was calibrated to 100 mW/cm<sup>2</sup> using a Si-reference cell certified by NREL for the measurements. The conventional  $J$ - $V$  curves were measured under both forward and reverse scans. The solar cell IPCE measurement system (Solar Cell Scan 100) is used to analyze the incident photon-electron conversion efficiency (IPCE).

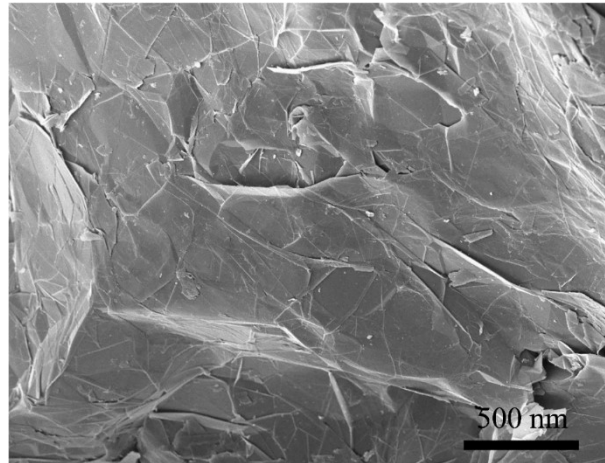

**Figure S1.** SEM image of synthesized reduce graphene oxide (rGO).

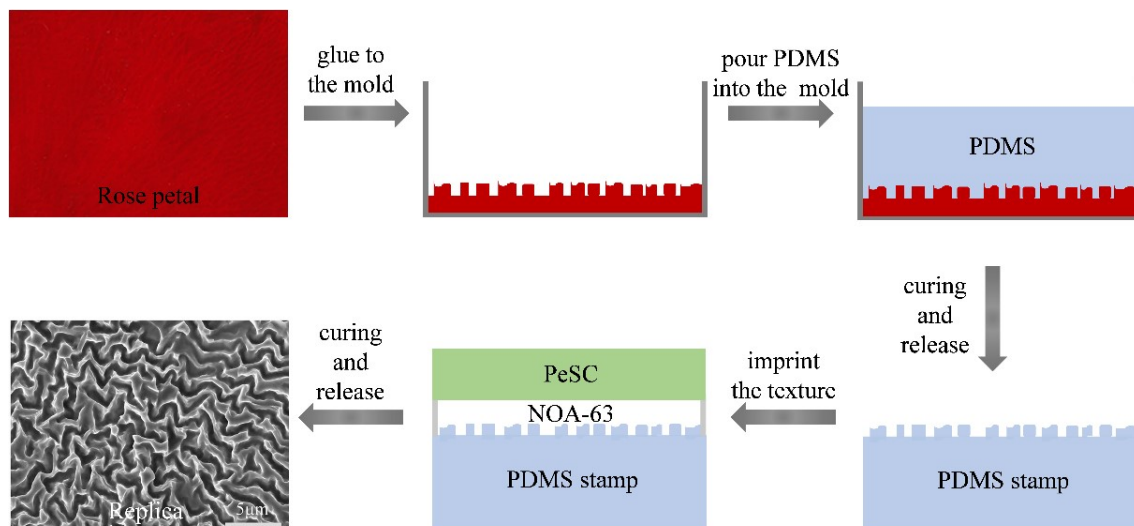

**Figure S2.** Schematic of the replication process.

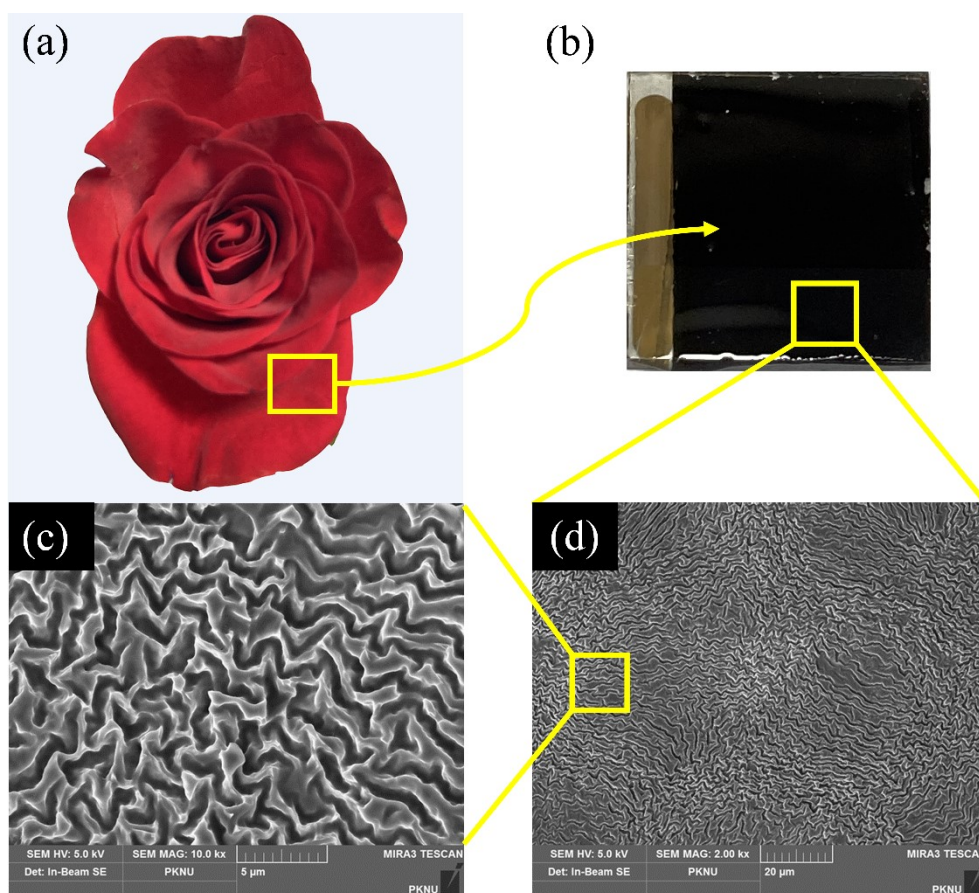

**Figure S3.** (a) Photograph of the original rose petals. (b) Photograph of the UV-absorbing layer with the replicated rose surface texture. (c, d) The SEM images of the replicated rose surface texture at different magnifications.

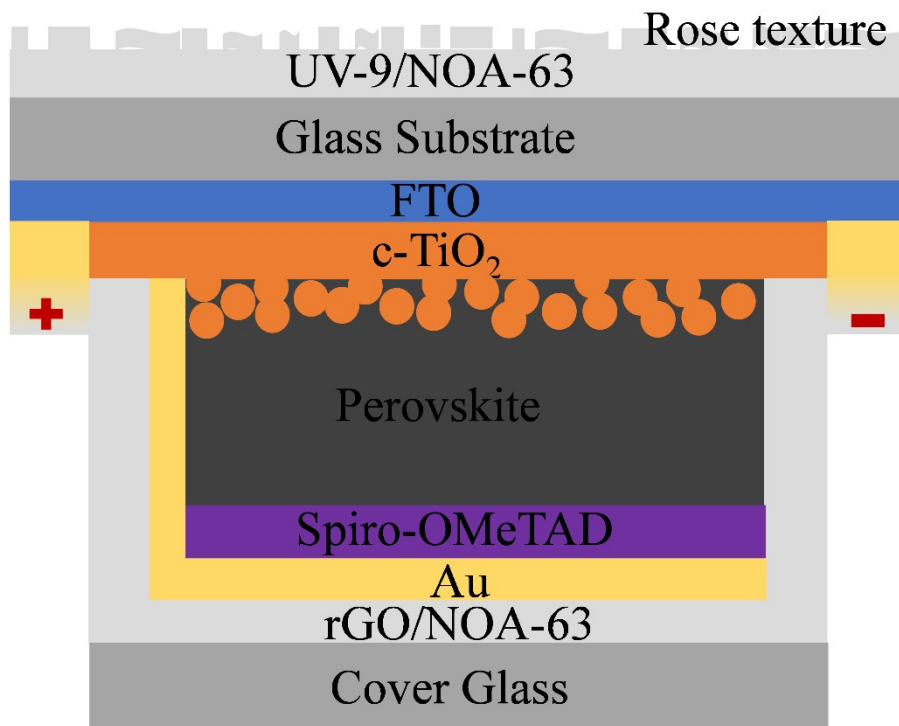

**Figure S4.** Structure of PeSC encapsulated with rGO/NOA-63 encapsulation film.



## 2. Optical properties of the UV-absorbing layer

To investigate the effect of the concentration of UV-9 hosted in the NOA-63 matrix on the optical properties of the UV-absorbing layer, absorption spectra of the UV-absorbing layer at increasing UV-9 concentrations were collected on 5  $\mu\text{m}$  thick UV-absorbing layer, as shown in **Figure S5**. As expected, a progressive increase in UV-9 concentration leads to a correspondingly increased absorption intensity (absorbance).

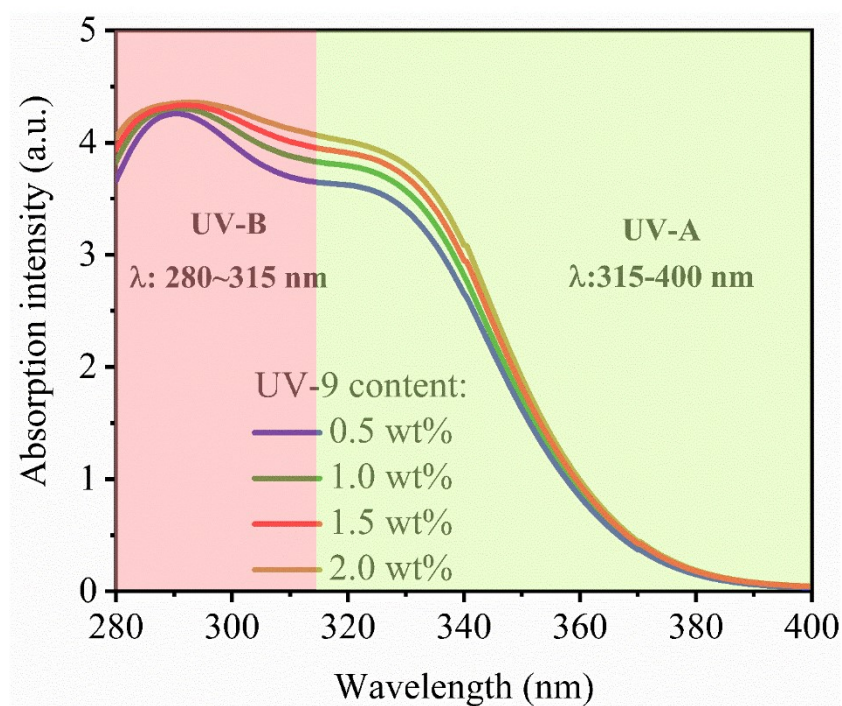

**Figure S5.** UV-vis absorption spectra of the UV-absorbing layer at increasing UV-9 concentration.

### 3. Thermal properties of the UV-absorbing layer

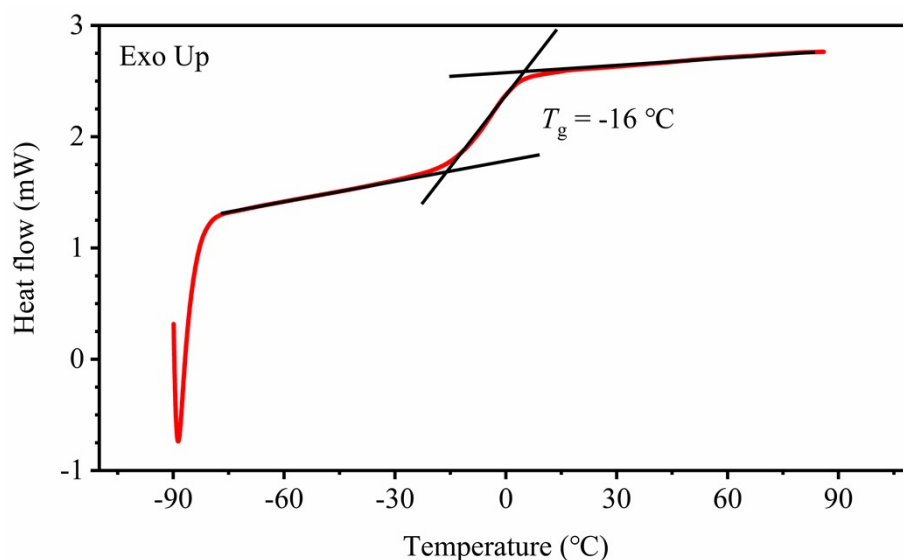

**Figure S6.** DSC trace of the UV-absorbing layer.

DSC thermogram of the UV-absorbing layer. As segmented block polyurethane, UV-absorbing layer is expected to possess two different glass transition temperatures ( $T_g$ ) values. However, the curve exhibits only one  $T_g$  of  $-16\text{ °C}$ . This may be due to the fact that the NOA-63 and UV-9 are well-dispersed and blended within the films; thus, oligomer consists of one phase. The DSC thermograms of the copolymer/absorbent blends showed only one  $T_g$ , which revealed the homogeneous system of absorbent/copolymer and the miscibility of the absorbent with the copolymer.

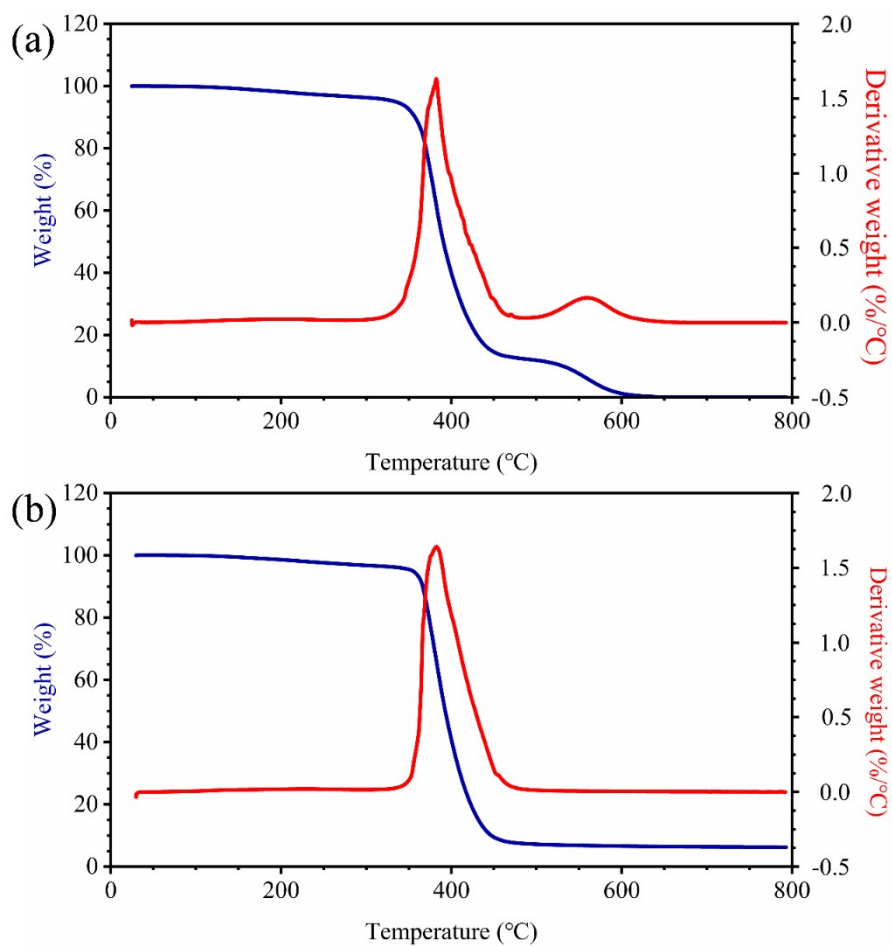

**Figure S7.** TGA thermograms of the UV-absorbing layer carried out (a) in air and (b) in nitrogen atmosphere.

#### 4. Surface wettability behavior of the UV-RT

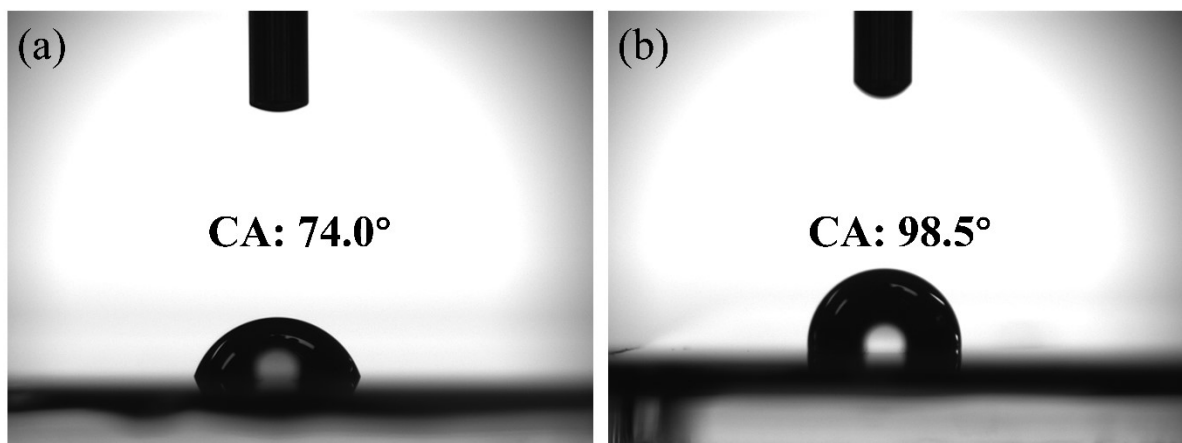

**Figure S8.** Images of water drops on surfaces of (a) UV-absorbing layer and (b) surface rose texture UV-absorbing layer.

**Figure S8** shows surface images of liquid drops; rose texture on UV-absorbing layer increase the contact angle from  $74.0^\circ$  to  $98.5^\circ$ . The rose texture increases the surface roughness, thus increasing the contact angle. This means that the surface of the surface rose texture UV-absorbing layer is more hydrophobic. Micropatterning thus enables reduced water condensation and dust accumulation. Therefore, the UV-RT may facilitate self-cleaning ability.

## 5. Optical properties of the UV-RT

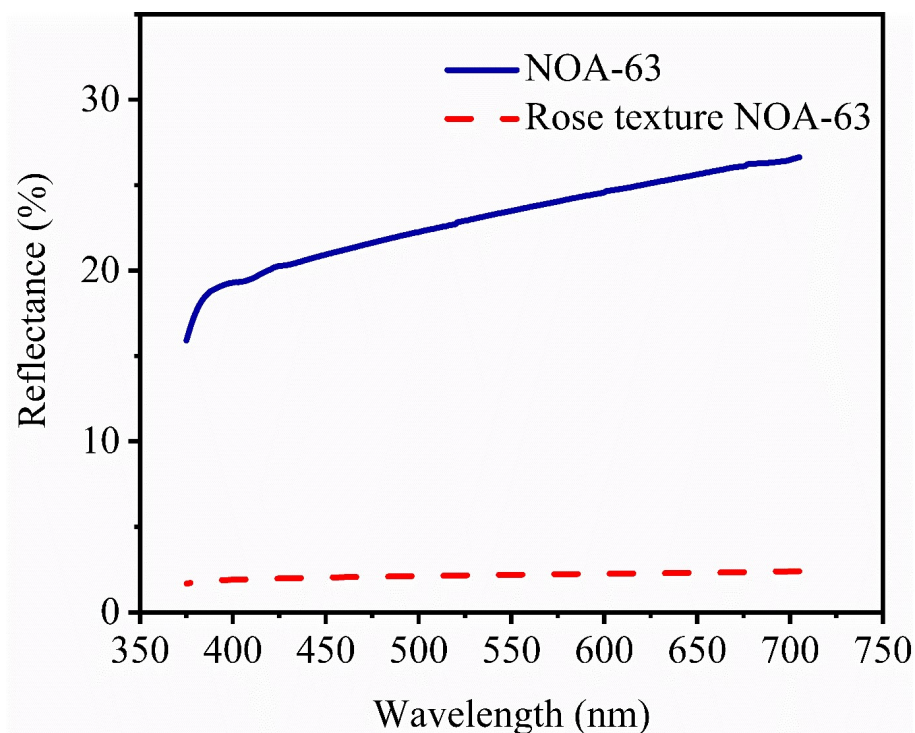

**Figure S9.** The reflectance spectra of NOA-63 and surface rose texture NOA-63.

The flat NOA-63 film shows the average reflectance of 22.98% in the visible wavelength range between 400 nm and 700 nm. However, the average reflectance of the rose texture NOA-63 film is 2.16%. This is attributed to the surface micro-/nano hierarchical structure effect, which decreases light reflection. In addition, the increased transmission of the rose texture NOA-63 film is attributed to the light scattering on the patterned surface.



## 6. The temperature of PeSCs with the encapsulation layer

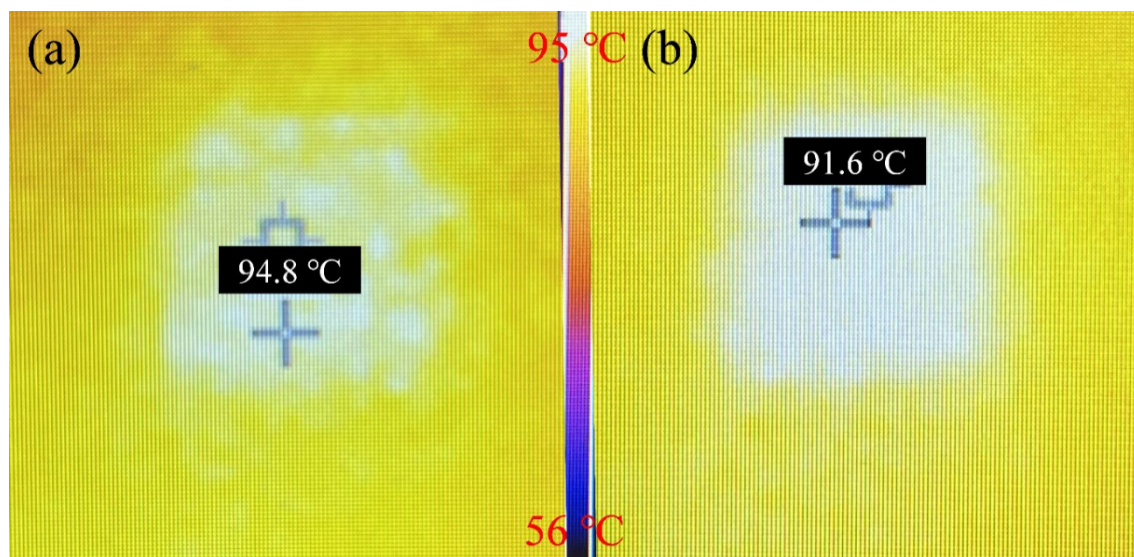

**Figure S10.** (a) The NOA-63 layer-coated glass plate (NOA-63/glass) and (b) the rGO/NOA-63 layer-coated glass plate (rGO/NOA-63/glass) were placed on the hot plate at 95 °C and heated from the bottom of the glass plate.

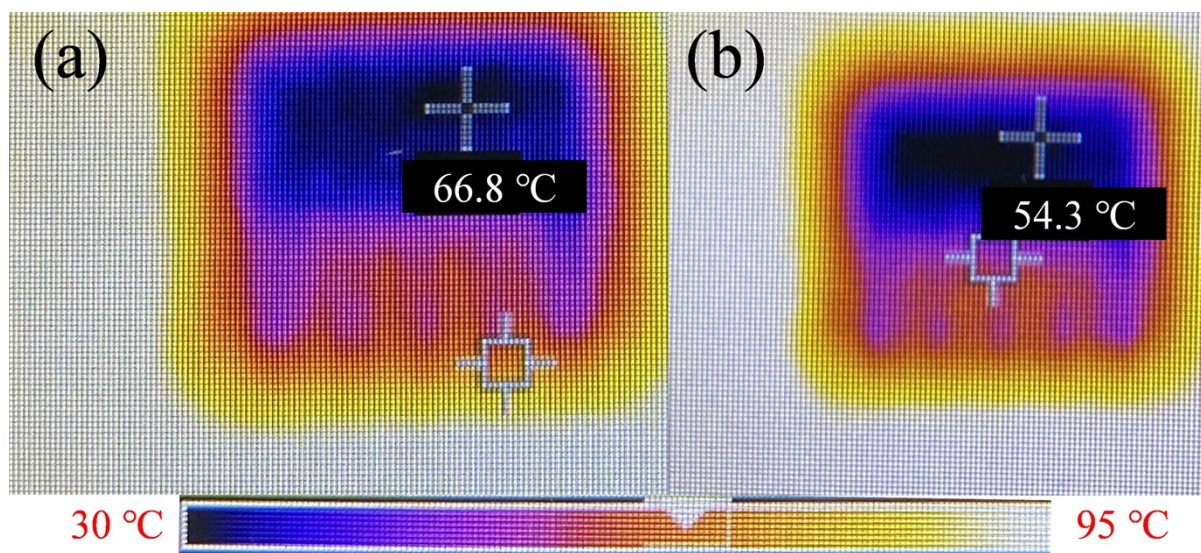

**Figure S11.** Infrared thermal camera images of (a) the NOA-63 coated PeSC and (b) the rGO/NOA-63 coated PeSC. (Hot plate at 95 °C)

## 7. UV stability of organic solar cells

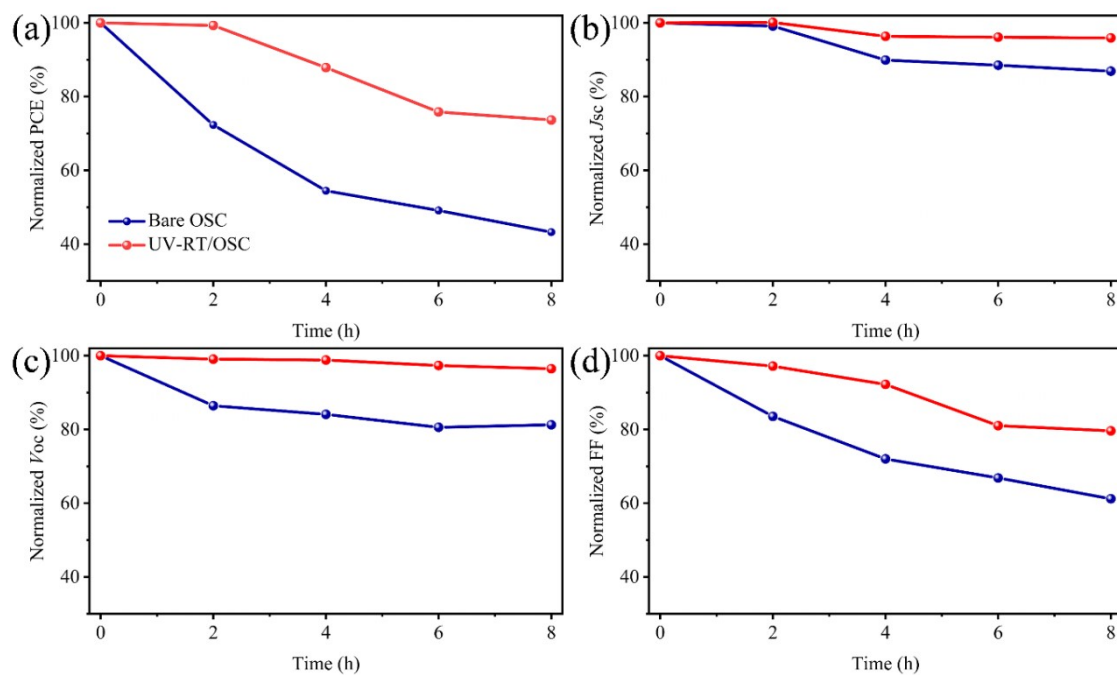

**Figure S12.** UV stability of OSCs under 60 mW/cm<sup>2</sup> UV light (wavelength of 365 nm) for 8 h in nitrogen condition.

**Table S1.** Photovoltaic parameters of PeSCs coated with the UV-AR loaded with different amounts (0.5 to 2 wt. %) of UV-9.

Average values for uncoated devices are also show for comparison purposes. Each experimental condition was reproduced 5 times on different devices; solar cells were tested under 1 Sun, AM1.5G, at a scan rate of 5 mV s<sup>-1</sup> and with a mask are of 0.08 cm<sup>2</sup>.

| UV-9<br>(wt%) | <i>J</i> <sub>sc</sub><br>(mA/cm <sup>2</sup> ) | <i>V</i> <sub>oc</sub><br>(V) | FF<br>(%)  | PCE<br>(%) |
|---------------|-------------------------------------------------|-------------------------------|------------|------------|
| Control       | 24.35±0.37                                      | 1.08±0.02                     | 80.14±1.41 | 21.08±0.63 |
| 0.5           | 25.50±0.43                                      | 1.08±0.02                     | 79.25±1.53 | 21.83±0.80 |
| 1.0           | 25.55±0.28                                      | 1.09±0.01                     | 79.92±1.64 | 22.26±0.45 |
| 1.5           | 24.87±0.51                                      | 1.07±0.04                     | 79.35±1.27 | 21.12±1.08 |
| 2.0           | 24.26±0.59                                      | 1.09±0.03                     | 79.25±1.78 | 20.97±1.31 |



## References

1. A. Hassani, P. Eghbali, F. Mahdipour, S. Wacławek, K.-Y. A. Lin and F. Ghanbari, *Chemical Engineering Journal*, 2023, **453**, 139556.
2. M. Kim, J. Jeong, H. Lu, T. K. Lee, F. T. Eickemeyer, Y. Liu, I. W. Choi, S. J. Choi, Y. Jo, H.-B. Kim, S.-I. Mo, Y.-K. Kim, H. Lee, N. G. An, S. Cho, W. R. Tress, S. M. Zakeeruddin, A. Hagfeldt, J. Y. Kim, M. Grätzel and D. S. Kim, *Science*, 2022, **375**, 302-306.
